# Supplementary material for: Innovative Computerized Dystrophin Quantification Method Based on Spectral Confocal Microscopy
Source: MDPI journal article supplement (doi:10.3390/ijms24076358), 2023-03-28
Supplement: s1 [file s1]

Supplemantary Table S1.

Clinical, genetic and fluorescence intensity obtained with spectral confocal microscopy data from patients and healthy controls.

| PATIENT CODE | DIAGNOSIS | MUSCLE           | DIAGNOSTIC CATEGORY (DYSTROPHIN MUTATION)    | AGE AT BIOPSY | AGE AT ONSET | DYS 1 MEAN FLUORESCENCE INTENSITY (A.U.) | DYS 2 MEAN FLUORESCENCE INTENSITY (A.U.) | DYS 3 MEAN FLUORESCENCE INTENSITY (A.U.) |
|--------------|-----------|------------------|----------------------------------------------|---------------|--------------|------------------------------------------|------------------------------------------|------------------------------------------|
| SJD_LS_1     | DMD       | Unknown          | Deleted exons 46-49                          | 6 years       | 5 years      | 679,98 ± 20,55                           | 362,17 ± 12,80                           | 287,93 ± 10,69                           |
| SJD_LS_2     | DMD       | Right quadriceps | NM_004006.2):c.6286C>T; p.Gln2096*           | 6 years       | 4 years      | 211,26 ± 7,17                            | 220,50 ± 7,64                            | 259,4 ± 7,5                              |
| SJD_LS_3     | DMD       | Right quadriceps | NM_004006.2:c.4084C>T; p.Gln1362*            | 6 years       | 3 years      | 433,52 ± 18,71                           | 172,13 ± 5,83                            | 272,77 ± 7,13                            |
| SJD_LS_4     | BMD       | Right quadriceps | DELECIION IN FRAME 45>49                     | 6 years       | 5 years      | 1550,29 ± 59,28                          | 1665,77 ± 75,84                          | 700,06 ± 26,28                           |
| SJD_LS_5     | DMD       | Quadriceps       | NM_004006.2:c.3578T>A; p.Leu1193*            | 6 years       | 18 months    | 157,11 ± 5,27                            | 257,69 ± 9,34                            | 278,60 ± 8,58                            |
| SJD_LS_6     | DMD       | Quadriceps       | NM_004006.2:c.2215G>T; p.Glu739*             | 5 years       | 2 years      | 222,56 ± 8,73                            | 92,14 ± 3,23                             | 74,58 ± 3,02                             |
| SJD_LS_7     | DMD       | Unknown          | Deleted exon 53                              | 5 years       | 2 years      | 190,40 ± 7,17                            | 93,88 ± 2,93                             | 102,23 ± 3,74                            |
| SJD_LS_8     | BMD       | Unknown          | Duplicated exons 6, 7, 8 i 9                 | 5 years       | 4 years      | 1529,42 ± 53,38                          | 1445,9 ± 52,18                           | 610,84 ± 22,86                           |
| SJD_LS_9     | DMD       | Right quadriceps | NM_004006.2:c.583C>T; p.Arg195*              | 5 years       | 2 years      | 602,03 ± 21,92                           | 494,80 ± 16,47                           | 267,06 ± 6,79                            |
| SJD_LS_10    | DMD       | Right deltoid    | Deleted exon 48                              | 4 years       | 4 years      | 1800,45 ± 42,09                          | 2518,14 ± 48,20                          | 761,01 ± 28,14                           |
| SJD_LS_11    | DMD       | Unknown          | Deleted exons 8-17                           | 4 years       | 3 years      | 239,01 ± 9,89                            | 793,68 ± 21,85                           | 330,34 ± 8,02                            |
| SJD_LS_12    | BMD       | Unknown          | Deleted exons 13 - 19                        | 4 years       | 3 years      | 492,85 ± 14,76                           | 547,3 ± 20,78                            | 267,15 ± 9,64                            |
| SJD_LS_13    | DMD       | Unknown          | NM_004006.2:c.6651_6652del; p.Asp2219Phefs*3 | 4 years       | 2 years      | 486,81 ± 14,87                           | 1018,20 ± 34,61                          | 323,31 ± 11,51                           |
| CONTROL 1    |           | Trapeze          | Right Scapula surgery                        | 15 years      |              | 3315,04 ± 63,38                          | 3568,77 ± 41,30                          | 3567,19 ± 52,20                          |
| CONTROL 2    |           | Gracilis         | Gracilis muscle transfer                     | 5 years       |              | 3756,77 ± 29,98                          | 2689,88 ± 82,27                          | 3704,91 ± 36,88                          |
| CONTROL 3    |           | Flexor           | Compression of ulnar nerve                   | 18 years      |              | 1214,11 ± 32,08                          | 1435,76 ± 42,15                          | 1214,11 ± 32,05                          |
| CONTROL 4    |           | Pectoral         | Cardiomyopathy                               | 9 years       |              | 3755,71 ± 35,13                          | 2767,77 ± 88,78                          | 3456,18 ± 63,63                          |
| CONTROL 5    |           | Femoral biceps   | Osteochondroma                               | 14 years      |              | 2567,42 ± 48,13                          | 2909,11 ± 5709                           | 2673,72 ± 63,62                          |
| CONTROL 6    |           | Biceps           | Derotatory osteotomy of humerus              | 14 years      |              | 2641,25 ± 53,47                          | 2544,78 ± 70,20                          | 2642,73 ± 76,45                          |
